1 **ANME-1 archaea drive methane accumulation and removal in estuarine**  
2 **sediments**

3

4

5 **Richard Kevorkian<sup>a</sup>, Sean Callahan<sup>a</sup>, Rachel Winstead<sup>a</sup>, and Karen G. Lloyd<sup>a,#</sup>**

6 <sup>a</sup>Department of Microbiology, University of Tennessee, Knoxville, Tennessee

7 # Correspondence to Karen G. Lloyd, University of Tennessee, 307 Mossman, Knoxville, TN

8 37996, tel: 865-974-4224, fax: 865-974-4007, [klloyd@utk.edu](mailto:klloyd@utk.edu)

9

10

11

12

13

14

15

16

17

18

## 19 Abstract

20           Uncultured members of the Methanomicrobia called ANME-1 perform the anaerobic  
21 oxidation of methane (AOM) through a process that uses much of the methanogenic pathway. It  
22 is unknown whether ANME-1 obligately perform AOM, or whether some of them can perform  
23 methanogenesis when methanogenesis is exergonic. Most marine sediments lack advective  
24 transport of methane, so AOM occurs in the sulfate methane transition zone (SMTZ) where  
25 sulfate-reducing bacteria consume hydrogen produced by fermenters, making hydrogenotrophic  
26 methanogenesis exergonic in the reverse direction. When sulfate is depleted deeper in the  
27 sediments, hydrogen accumulates making hydrogenotrophic methanogenesis exergonic, and  
28 methane accumulates in the methane zone (MZ). In White Oak River estuarine sediments, we  
29 found that ANME-1 comprised 99.5% of 16S rRNA genes from amplicons and 100% of 16S  
30 rRNA genes from metagenomes of the Methanomicrobia in the SMTZ and 99.9% and 98.3%,  
31 respectively, in the MZ. Each of the 16 ANME-1 OTUs (97% similarity) had peaks in the SMTZ  
32 that coincided with peaks of putative sulfate-reducing bacteria *Desulfatiglans sp.* and SEEP-  
33 SRB1. In the MZ, ANME-1, but no putative sulfate-reducing bacteria or cultured methanogens,  
34 increased with depth. Using publicly available data, we found that ANME-1 was the only group  
35 expressing methanogenic genes during both net AOM and net methanogenesis in an enrichment.  
36 The commonly-held belief that ANME-1 perform AOM is based on the fact that they dominate  
37 natural settings and enrichments where net AOM is measured. We found that ANME-1 also  
38 dominate natural settings and enrichment where net methanogenesis is measured, so we conclude  
39 that ANME-1 perform methane production. Alternating between AOM and methanogenesis,  
40 either in a single ANME-1 cell or between different subclades with similar 16S rRNA sequences

41 of ANME-1, may confer a competitive advantage, explaining the predominance of low-energy  
42 adapted ANME-1 in methanogenic sediments worldwide.

43

44 **Abstract Importance:** Life may operate differently at very low energy levels. Natural  
45 populations of microbes that make methane survive on some of the lowest energy yields of all  
46 life. From all available data, we infer that these microbes alternate between methane production  
47 and oxidation, depending on which process is energy-yielding in the environment. This means  
48 that much of the methane produced naturally in marine sediments occurs through an organism  
49 that is also capable of destroying it under different circumstances.

50

51

## 52 **Main Text**

53 Non-seep marine sediments are the third largest producers of methane on Earth, after rice  
54 production and wetlands (1). However, very little of this methane reaches the ocean floor  
55 because abundant uncultured archaea of the Methanomicrobia group, called ANaerobic MEthane  
56 oxidizers (ANME), catalyze the anaerobic oxidation of methane (AOM) (2, 3). However, the  
57 identities of the organisms that produce the majority of this methane are largely unknown in non-  
58 seep sediments, since cultured methanogenic groups are often difficult to find in methanogenic  
59 depths of coastal sediments (4). Some researchers have suggested that ANME can also be  
60 capable of methane production, mostly from studies showing that they are the most abundant  
61 putative methane-metabolizing organisms in methane-producing non-seep sediments (5–9).

62 However, sampling with a fine depth resolution as sediments switch from net methane removal  
63 to net methane production is required to determine whether ANME-1 might drive this shift. This  
64 is because the total population sizes of ANME-1 or other likely methanogens may be dynamic  
65 over spatial scales that are missed by studies examining only a few depths distributed throughout  
66 a sediment column.

67 Most microbes in marine sediments belong to uncultured genera to phyla (10), making it  
68 necessary to infer their physiologies in a natural setting rather than in axenic cultures. Some of  
69 these microbes drive sulfate reduction and methanogenesis, which are the key respiratory  
70 processes that directly or indirectly oxidize organic matter in anoxic marine sediments. The  
71 balance between diffusion and biological respiration drives a down-core shift from sulfate  
72 reduction to methanogenesis, with net removal of methane through AOM in the sulfate methane  
73 transition zone (SMTZ) at intermediate depths (11). Methanogens conserve energy by producing  
74 methane from hydrogen plus carbon dioxide, acetate, formate, or a range of methylated  
75 compounds. When methanogenesis is produced from hydrogen plus carbon dioxide, it is referred  
76 to as hydrogenotrophic methanogenesis (Eq. 1). In the SMTZ, sulfate reducers keep hydrogen  
77 concentrations low enough to make hydrogenotrophic methanogenesis exergonic in the reverse  
78 direction (12). This is possible because hydrogenotrophic methanogenesis, unique among many  
79 other respiratory mechanisms, can be made to be exergonic in the reverse direction by changing  
80 the relative concentrations of products and reactants. Hydrogenotrophic methanogenesis (Eq. 1)  
81 is reversible because 1) it has a stoichiometry of 4 molecules of hydrogen per methane molecule,  
82 giving hydrogen activities (activity is similar to concentration, after accounting for the ionic  
83 strength of the solution) a large amount of power over the thermodynamics and 2) hydrogen  
84 activities in marine sediments can be extremely low, down to  $\sim 10^{-9}$  times the standard state

85 activity (13). *In situ* measurements of porewater chemistry have demonstrated this reversal of  $\Delta G$   
86 between the SMTZ and the methane-containing zone when hydrogen concentrations decrease  
87 (14).

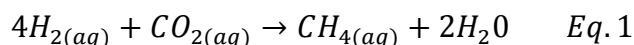

88 While some metabolic pathways such as the citric acid cycle are amphibolic (15),  
89 meaning they can occur in either the catabolic or anabolic direction, it is unknown whether a  
90 single organism can conserve energy from either hydrogenotrophic methanogenesis or AOM,  
91 depending on which direction is exergonic. Although cultured methanogens have been shown to  
92 catalyze methane oxidation, they cannot sustain the process, leading Valentine et al. to conclude  
93 that AOM does not occur through a reversal of the methanogenic metabolic pathway in most of  
94 the commonly-studied methanogenic strains in culture (16). However, it is possible that these  
95 methanogens could not sustain hydrogen production because they were adapted to very high  
96 energy yields (17) and could not survive on the paucity of energy afforded by AOM. ANME-1  
97 archaea, on the other hand, have low energy requirements (18), making them good candidates for  
98 being reversible methanogens. ANME-1 are present and active in both AOM and methanogenic  
99 zones (8, 19–21), and they are phylogenetically related to cultured methanogens, belonging to  
100 the Methanomicrobia, a group for which all cultured strains are methanogens (22). Initial  
101 incomplete genomes from ANME-1 contained all of the genes required for methane production  
102 except for the one encoding N5, N10-methylene-tetrahydromethanopterin reductase (*mer*) (23,  
103 24). More recently, *mer* has been found in ANME-1 genomes (20). ANME-1 has been shown to  
104 be enriched during methane production (5), and its biomass has variable stable carbon isotope  
105 values in nature, suggesting that it can use substrates other than methane to make biomass (7).

106 In order to infer physiology of uncultured ANME-1, we examined its population growth  
107 dynamics in fine-scale depth resolution in sediments of the White Oak River estuary and  
108 laboratory enrichments with publically available data (25). Sediments experiencing a consistent  
109 and known sedimentation rate offer an opportunity to substitute depth for time and test for the  
110 increase of a microbial population over a particular depth interval. An increase in total  
111 population size with depth implies that net growth must have occurred, although it may have  
112 been faster than the measured increase rate due to an unknown death rate. Similarly, a decrease  
113 in population size with increasing depth implies net death. Quantifying the absolute abundance  
114 of a particular microbial population in marine sediments, however, is inaccurate with current  
115 methods such as 16S rRNA gene amplicon libraries, quantitative PCR (qPCR) and Fluorescent  
116 In Situ Hybridization (FISH) (26–28). However, two of these methods, 16S rRNA gene  
117 amplicon libraries and qPCR, are quantitative in relative terms when comparing samples with  
118 similar DNA extraction and amplification biases (27, 28). Therefore, in order to measure  
119 increases or decreases in population size with depth, one can determine the change in the  
120 Fraction Read Abundance times total Cell count (FRAXC) with depth (29).

121 We examined 16S rRNA gene sequence FRAXC with high depth resolution (3 cm  
122 intervals in the upper 10 cm, 1 cm intervals between 10 and 60 cm, and then 3 cm intervals from  
123 60 to 80 cm below the sediment-water interface) throughout a diagenetic sequence in sediments  
124 of the marine-influenced White Oak River estuary. Due to sediment volume restrictions from the  
125 small depth intervals, 16S rRNA gene amplicon libraries, cell counts, and hydrogen  
126 concentrations were measured for one core (core 6), sulfate concentrations were measured for the  
127 other (core 1), and methane concentrations and  $\delta^{13}\text{C}$  values were measured on both cores. The  
128 fine depth resolution allowed us to visualize any die-off and regrowth of ANME-1 between

129 AOM and methanogenic zones, which would suggest that different ANME-1 populations  
130 perform each of the two metabolisms. The finescale approach also allowed the potential  
131 detection of cultured methanogens in any of the sediment layers that may have been missed in  
132 previous studies of estuarine sediments.

133

## 134 **Results/Discussion**

135 Total cell abundance decreased sharply within the first 10 cm from  $2.0 \times 10^8$  to  $2.6 \times 10^7$   
136 cells/g and remained steady at  $\sim 1.3 \times 10^7$  cells/g for the rest of the core (Fig. 1a). Sulfate  
137 concentrations in core 1 decreased from a surficial concentration of 11.2 mM to a constant  
138 concentration of  $0.06 \pm 0.02$  mM at 65 to 78 cm (Fig. 1e). This concave decrease in sulfate is  
139 consistent with it being consumed by sulfate-reducing bacteria (30). Aqueous methane  
140 concentrations were  $\sim 0.004$  mM in near-surface sediment and increased to  $>0.6$  mM at 60 cm in  
141 core 6 (Fig. 1f) and 75 cm in core 1 (Fig. 1b), with a generally concave shape indicating AOM.  
142 Below this, methane increased to 0.73-0.87 mM in the 75-78 cm depth interval of both cores. In  
143 core 6, methane concentrations the methane concavity shifted between  $\sim 55$  cm and 73 cm,  
144 consistent with methanogenesis. Between 2.5 cm and 64.5 cm, hydrogen concentrations were  
145 low (0.07 - 2.05 nM) in core 6 (Fig. 1d), consistent with those predicted for sulfate reducers  
146 operating at their minimum energy ( $1.22 \pm 0.45$  nM in similar sediments, which yields a  $\Delta G$  of -  
147 20 kJ/mol sulfate, just slightly above the minimum free energy conservation (13)). Below this,  
148 hydrogen increased above 6 nM, higher than the threshold for energy conservation for  
149 hydrogenotrophic methanogenesis at 5.11 nM in similar sediments (13). In core 1,  $\delta^{13}\text{C}$  of  
150 methane decreased from  $-41\% \pm 1.17$  at 41.5 cm to  $-72\% \pm 0.10$  at 73.5 cm (Fig 1g). In core 6,

151  $\delta^{13}\text{C}$  of methane decreased from  $-46\text{‰} \pm 0.20$  at 29.5 cm to  $-74\text{‰} \pm 0.02$  at 67.5 cm (Fig. 1c).  
152 These values are consistent with the biogenic production of methane deeper in the sediments,  
153 resulting in enrichment of the lighter carbon isotope,  $^{12}\text{C}$  (31). Within the SMTZ, methane  
154 diffusing up through the sediment became gradually depleted in the lighter carbon isotope,  
155 consistent with AOM (32). This is because biological AOM has a preference for  $^{12}\text{C}$  over  $^{13}\text{C}$ ,  
156 leaving the residual methane  $^{13}\text{C}$ -enriched (33, 34). The shift in  $\delta^{13}\text{C}\text{-CH}_4$  toward “heavier”  
157 values between ~60 and 30 cm indicates methane oxidation occurs in this depth interval.  
158 Methane concentrations in samples shallower than the AOM zone were too low to get accurate  
159  $\delta^{13}\text{C}$  values, so the values in the upper parts of the cores were not used. Together, these  
160 geochemical measurements suggest the location of AOM (30 to ~60 cm) and methanogenesis  
161 (>60 cm) in core 6, the core where DNA measurements were made. The depth of the onset of net  
162 methanogenesis was chosen at ~60 cm because it is the depth where 1) sulfate is depleted in core  
163 1, 2) hydrogen concentrations begin to continuously increase in core 6, 3) methane  
164 concentrations are concave-down, and 4)  $\delta^{13}\text{C}$  values become consistent with methanogenesis.  
165 The upper limit of AOM is defined by the depth at which methane concentrations begin to  
166 continuously increase downcore, which is 25 cm in core 6 and 45 cm in core 1. For consistency  
167 in nomenclature based on the available substrates, we refer to the depths where methane is  
168 present above 60cm the SMTZ, and the depths below 60cm the MZ, for methane zone.

169 ANME-1 dominated the Methanomicrobia in 16S rRNA gene amplicon libraries in both  
170 the SMTZ and MZ (99.5 and 99.9%, respectively, Fig. 2). In previous work, ANME-1 were  
171 shown to express methyl coenzyme M reductase subunit A (*mcrA*) genes, a key gene in  
172 methanogenesis and AOM (36), in both of these zones as well (8). ANME-1 comprised six  
173 OTUs of ANME-1a, nine OTUs of ANME-1b, and one ANME-1 OTU that could not be placed



174 into one of those two subgroups. This agrees with previous observations from Aarhus Bay (20),  
175 White Oak River estuary (8), Gulf of Mexico deep-sea (19), and Santa Barbara Basin deep-sea  
176 (21) that ANME-1 were the dominant or only organisms with the genes for methane-cycling in  
177 AOM and methanogenic sediments. Each of these analyses utilized 16S rRNA primers capable  
178 of amplifying cultured methanogens, so the absence of cultured methanogens was not likely to  
179 be an artifact of primer bias. However, primer bias can greatly skew the relative abundance of  
180 different clades (26), so we analyzed 16S rRNA gene sequences from unamplified metagenomes  
181 from the White Oak River estuary (37) and found that ANME-1 comprised 100% of the  
182 Methanomicrobia in the AOM zone and 92.86% in the MZ, in agreement with amplicon data  
183 (Fig. 2).

184         The four most abundant ANME-1 OTUs, comprising 96% of all ANME-1 16S rRNA  
185 gene sequences, had one or more FRaXC peaks in the SMTZ that coincided with peaks in  
186 putative sulfate-reducing bacteria *Desulfatiglans sp.* and SEEP-SRB1 (Fig. 3). SEEP-SRB1 have  
187 been shown to form syntrophies with ANME-1 (25). *Desulfatiglans sp.* have not previously been  
188 associated with syntrophies with ANME-1, but were the most abundant sulfate-reducing bacteria  
189 in ANME-1-dominated methane seeps in the Gulf of Mexico (38). In White Oak River estuary  
190 sediments, *Desulfatiglans sp.* and SEEP-SRB1 comprised 99.9% of 16S rRNA gene sequences  
191 of known sulfate-reducing bacteria clades in both the SMTZ and MZ. They were distinct from  
192 the dominant clades present in the upper, methane-free sulfate reduction zone: *Desulfobulbus sp.*  
193 and the uncultured Sva0081 clade within the Desulfobacteraceae (94% of sulfate-reducing  
194 bacteria above 25 cm, Fig. 2). The dominance patterns of these potentially sulfate-reducing  
195 clades is supported by metagenomic data as well (Fig. 2). This suggests that *Desulfatiglans sp.*  
196 and SEEP-SRB1 may be adapted to syntrophy with ANME-1 in the SMTZ, and this may allow

197 them to out-compete other sulfate-reducing bacteria deeper in the core when ANME-1 are  
198 abundant.

199         The most abundant ANME-1b OTU, which accounted for 83% of total ANME-1 reads,  
200 did not undergo a population decrease at the base of the SMTZ followed by an increase in the  
201 MZ (Fig. 3a), as was suggested in a previous experiment with lower depth resolution (8). This  
202 suggests that, for most ANME-1b, if they switch from methane-oxidizing to methane-producing,  
203 this either does not require a die-off followed by a separate population growing up, or the  
204 population decrease happens in a smaller depth interval than we could observe with 1 cm  
205 intervals. A third possibility is that a population decrease does occur between the SMTZ and  
206 MZ, but seasonal variability of SMTZ depth (8) dampens the coherence of this signal. Two  
207 ANME-1b OTUs decreased with depth in the MZ (Fig. 3b and 3d). This suggests that either  
208 reversibility is not universal among ANME-1 subpopulations, or that some subpopulations were  
209 outcompeted by other ANME-1 in the MZ. One ANME-1a OTU, which accounted for 3% of the  
210 total ANME-1 reads, did decrease at the base of the SMTZ and increase in the MZ, suggesting  
211 that die-off and regrowth may be required for some ANME-1 populations to switch between  
212 methane oxidation and production. In total, ANME-1 populations increased relative to those of  
213 sulfate-reducing bacteria throughout the transition from SMTZ to MZ (Fig. 4).

214         The most abundant *Desulfatiglans sp.* OTU maintained its population through the MZ,  
215 and all others decreased, suggesting that successively smaller populations were capable of  
216 meeting their energetic needs on either cryptic sulfur cycling or fermentation as substrates were  
217 depleted with depth (Fig. 4). The coupling of ANME-1 and sulfate-reducing bacteria populations  
218 in the SMTZ, and their decoupling in the MZ, is consistent with ANME-1 switching from AOM,  
219 which requires a sulfate-reducing partner, to methanogenesis, which does not. ANME-1a and

220 ANME-1b were three- and five-fold higher in the SMTZ than in the MZ. The amount of methane  
221 that is produced over many tens of centimeters of sediment depth in the MZ is consumed over  
222 just a few centimeters sediment depth in the AOM zone. Therefore, a reversible methanogen  
223 operating at similar cell specific metabolic rates in the SMTZ and MZ would be expected to be  
224 in a higher cell density in the SMTZ than in the MZ, as was observed.

225         The only non-ANME-1 member of the *Methanomicrobia* detected was one OTU of  
226 *Methanobacteriales*, which ranged from 0 to 0.0026 % relative sequence abundance and  
227 decreased with depth in the MZ (Fig. 2), suggesting that it was not driving methanogenesis. The  
228 uncultured phylum, *Bathyarchaeota*, has been suggested to perform methane-cycling (39, 40)  
229 and increased in relative abundance with depth in the MZ (Fig. 2). However, the inference that  
230 *Bathyarchaeota* perform methane-cycling is based solely on the presence of an evolutionarily-  
231 divergent *mcrA* gene found in genomes from a terrestrial coal bed (39). Orthologs to this *mcrA*  
232 have been shown to catalyze butane rather than methane oxidation (41) and none of the  
233 *Bathyarchaeota* genomes obtained from the White Oak River estuary sediments have this gene  
234 (37). Instead *Bathyarchaeota* in marine sediments appear to perform acetogenesis and  
235 fermentation of organic substrates such as proteins and lignin (42, 43). Ten *Hadesarchaeota*  
236 OTUs increased in relative abundance in the MZ (Fig 2). This uncultured archaeal phylum has  
237 numerous carbon metabolism genes in common with *Methanomicrobia* but does not have a  
238 methanogenic enzymatic pathway. Instead *Hadesarchaeota* are hypothesized to have a  
239 heterotrophic and/or nitrogen cycling lifestyle (44). A proposed methyl-reducing methanogenic  
240 archaeal lineage, WSA2 (45), was also detected in our samples. However, the 11 OTUs were in  
241 very low relative abundance and declined below 27-30 cm (Fig. 2).

242 No bacteria or other archaea showed changes in relative or FRAx<sub>C</sub> abundance indicative  
243 of participation in methane cycling. OTUs from sulfide-oxidizing bacteria such as *Sulfurimonas*,  
244 *Thiotrichales*, and *Thiomicrospira* were either low in abundance, not detected, or demonstrated  
245 no significant increases in relative abundance with depth. Thirty-one OTUs of the  
246 organoheterotrophic genus *Caldithrix* and phylum *Defferibacteres* declined with depth (46).  
247 Obligate iron- and manganese-reducing bacteria either did not meet abundance thresholds or  
248 were not detected. Lokiarchaeota and Woesearchaeota both decreased in relative abundance  
249 sharply with depth. *Acidobacteria*, *Bacteroidetes*, *Latescibacteria*, *Nitrospirae*, *Defferibacteres*  
250 and *Gemmatimonadetes* all decreased with depth and accounted for less than 1% of total reads  
251 per sample. *Proteobacteria* declined steadily throughout the core from ~25% of total reads  
252 initially to ~4% by the end of the core (Fig 2). *Chloroflexi*, *Aminicenantes* and *Planctomycetes*  
253 all declined gradually throughout the core profile.

254 These downcore results suggest that ANME-1 performs either AOM or methanogenesis,  
255 but direct evidence for this is best obtained from experimental manipulation of an enrichment  
256 culture. Fortunately, ANME-1 enrichments have previously been shown to reverse between net  
257 AOM and net methanogenesis based on hydrogen and sulfate availability (2, 25, 34). One  
258 ANME-1 enrichment was shown to contain ANME-1 as the sole archaea, as well as SEEP-SRB1  
259 sulfate reducers, and other bacteria (2), and demonstrated that “methane consumption was  
260 reversibly inhibited” by hydrogen additions (25). Methane concentrations increased over a period  
261 of three days when hydrogen concentrations were high (> 0.5 mM), even when sulfate was  
262 present. We calculated the rate of this methane increase and found it to be equivalent to the rate  
263 of methane decrease after hydrogen was consumed (Fig. 5). As in most AOM enrichment  
264 cultures, AOM was assumed to be driven by the dominant archaea present (ANME-1); we tested

265 whether ANME-1 were also the dominant archaea present when the enrichments switched to net  
266 methane production.

267 We performed a Blast search of *mcrA* genes from all cultured methanogens and  
268 uncultured groups containing *mcrA* against the transcriptomes from these enrichments. RNA  
269 transcriptomes provide an accounting of all the genes that are being actively transcribed to RNA  
270 at the time of sampling, representing abundance and activity. We found that only ANME-1 had  
271 hits at an e-value cutoff of  $<1 \times 10^{-10}$ , during both net AOM and net methanogenesis, with the  
272 exception of  $<0.01\%$  hits to ANME-2, another clade of AOM-performing organisms (48) in two  
273 of the AOM-performing incubations (Fig. 5). Therefore, the only organism with the genes  
274 capable of methane metabolism in each of these incubations was ANME-1, and possibly ANME-  
275 2. Wegener et al. suggested that ANME-1 decreased in metabolic activity under conditions of net  
276 methanogenesis, since sulfate reducers prefer electrons from hydrogen than from AOM (49). In  
277 partial agreement with this interpretation, sulfate-reducing bacteria transcripts and those of  
278 dissimilatory sulfite reductase subunits A and B (*dsrAB*) increased relative to non-ANME  
279 organisms after hydrogen addition, suggesting sulfate-reducing bacteria were stimulated by the  
280 hydrogen additions (Fig. 5c). However, total ANME-1 transcripts did not decrease relative to  
281 background populations of other organisms after hydrogen addition (Fig. 5c), suggesting that  
282 ANME-1 populations were similarly abundant and active under both AOM and methanogenesis.  
283 ANME-1 *mcrA* transcripts, however, were greatly elevated under AOM conditions with low H<sub>2</sub>  
284 (Fig. 5). This is consistent with observations for cultured methanogens, which have been shown  
285 to up-regulate *mcrA* gene expression in response to low H<sub>2</sub> concentration (50, 51). Collectively,  
286 these transcript data support active methane metabolism by ANME-1, and only ANME-1, during  
287 net AOM and net methanogenesis in these enrichment experiments.

288           Enrichments of from Hydrate Ridge and Amon Mud Volcano show similar H<sub>2</sub>-dependent  
289   reversibility (35). In this study, washing the ANME-1 enrichments free of sulfate was sufficient  
290   to see steady methane increases over a period of 30 days, presumably fueled by hydrogen  
291   produced by fermentation of organic matter present in the enrichments. The fact that methane  
292   started being produced in less than a day and did not increase in production rate over 30 days  
293   suggests that the methane was produced by the ANME-1 that were already there, not a growing  
294   subpopulation of a different organism, since this would have caused an exponential methane  
295   increase and a substantial lag time. Adding H<sub>2</sub> to the headspace increased the rate 100-fold,  
296   further supporting hydrogenotrophic methanogenesis in ANME-1. The rate of methanogenesis in  
297   these experiments was much lower than that of AOM, likely because some ANME-1 cells were  
298   washed out of the system along with the sulfate. Collectively, these studies demonstrate that the  
299   evidence for ANME-1 enrichments performing methanogenesis is as strong as the commonly-  
300   accepted evidence that ANME-1 enrichments perform AOM.

301           If ANME-1 cells perform AOM through a reversible interspecific hydrogen transfer to  
302   sulfate-reducing bacteria, then ANME-1 must contain hydrogenases, which are enzymes capable  
303   of metabolizing hydrogen. Although ANME-1 genomes contain homologs for the hydrogenases  
304   of cultured methanogens, they have thus far been found to lack the active site (23, 25, 49). One  
305   possible explanation is that the active subunit of a typical methanogenic hydrogenase is present  
306   in ANME-1 genomes, but has not yet been sequenced because the genomes are incomplete, in a  
307   similar situation to the *mer* gene which was discovered when more genomes became available  
308   (20). Another possibility is that ANME-1 genomes contain a novel hydrogenase active site. All  
309   known methanogenic hydrogenases are from cultures grown with extremely high hydrogen  
310   concentrations (usually 80% by volume of the headspace). Obligate hydrogenotrophic

311 methanogens undergo major cellular rearrangements due to hydrogen limitation, such as  
312 *Methanocaldococcus jannaschii*, which produces flagella when hydrogen is low (17) and alters  
313 its central metabolic pathway by decreasing expression of H<sub>2</sub>-dependent methylene-  
314 tetrahydromethanopterin (H<sub>4</sub>MPT) dehydrogenase (Hmd), and increasing expression of  
315 coenzyme F<sub>420</sub>-dependent methylene-H<sub>4</sub>MPT dehydrogenase (Mtd) (52, 53). This may be  
316 because low extracellular hydrogen concentrations create a gradient that causes hydrogen, which  
317 is membrane-permeable, to “leak” out of the cell (54), making F<sub>420</sub> a more efficient electron  
318 carrier than H<sub>2</sub>. Adaptation of ANME-1 to low hydrogen conditions may explain the abundance  
319 of enzymes utilizing F<sub>420</sub> rather than hydrogen (23). ANME-1 contains Mtd, which alone is  
320 sufficient for metabolizing hydrogen (55). However, the lack of the alpha catalytic subunit  
321 suggests that ANME-1 may have a variation of Mtd with high hydrogen affinity, similar to the  
322 Hmd<sub>II</sub> variant of Hmd which has a high hydrogen affinity (56). Accordingly, Beulig et al. 2018  
323 hypothesized that one of the F<sub>420</sub>-reducing hydrogenases could access electrons from hydrogen  
324 either alone or in combinations with an adjacent heterodisulfide reductase or a Nuo-like  
325 oxidoreductase complex (20).

326         If ANME-1 has a reversible metabolism, then all the enzymes in the pathway must be  
327 reversible. Cells often ensure that metabolic reactions that are essential to the cell, yet operate at  
328  $\Delta G$  close to zero, only flow forward by employing “irreversible” enzymes. Such enzymes, such  
329 as phosphofructokinase in glycolysis, bind their product at an allosteric site away from the active  
330 site in order to disable the enzyme activity when product builds up, in order to prevent back-  
331 flow. However, all the genes of methanogenesis have been shown to be reversible (57); possibly  
332 because they are well-poised to catalyze whichever direction is exergonic. The high degree of  
333 reversibility of the hydrogenotrophic methanogenic enzymatic pathway is shown by the fact that

334 hydrogenotrophic methanogens express isotopic fractionation factors highly dependent on the  
335 free energy available for the reaction (52). Therefore, ANME-1 may gain energy through AOM  
336 in the SMTZ, increasing their cell abundance relative to other methanogens. Then, when  
337 hydrogen concentrations increase after sulfate is depleted, ANME-1 have a head start on these  
338 other methanogens, and can outcompete them for meager resources.

339         We conclude that ANME-1 performs methanogenesis in the MZ, because it is the  
340 dominant organism with the genetic capability to do so in both geochemically-characterized  
341 White Oak River estuary sediments and well-controlled laboratory experiments. This either  
342 occurs through a metabolic reversal depending on sulfate-reducing bacterial control of hydrogen  
343 concentrations (Fig. 6), or it is caused by subclades with identical 16S rRNA sequences that  
344 drive either AOM or methanogenesis. However, it does not appear to occur through a major die-  
345 off of the majority ANME-1 population at the base of the SMTZ. Our conclusion is further  
346 supported by geochemical models (12, 13), other ANME-1 enrichments (25, 35), reversibility of  
347 the methanogenic biochemical pathway (20), and dominance of ANME-1 in common marine  
348 sediments in geographically widespread areas (8, 19, 20). Although known methanogenic clades  
349 have been cultured from marine sediments and identified by gene surveys targeting cultured  
350 clades (58), we are not aware of any study that identified cultured methanogens in methanogenic  
351 marine sediments when using universal primers, except for salt marsh tidal flats which are  
352 periodically exposed to air (59). However, many studies of deep-sea sediments lack both  
353 ANME-1 and cultured methanogens (60, 61), meaning that our results should not be extrapolated  
354 to all deep-sea locations. Marine sediments are the third largest producers of methane on Earth,  
355 after rice production and wetlands, but they are only the ninth largest methane emitters (1). If  
356 ANME-1 archaea are responsible for methanogenesis in many marine sediments, then they are



357 some of the dominant methane emitters on Earth, in addition their better-known function as some  
358 of Earth's most efficient methane oxidizers. The prevalence of metabolically reversible ANME-1  
359 on Earth suggests that this level of extreme metabolic flexibility may be a more widespread  
360 feature of organisms specialized to survive in ultra-low energy environments. This could be used  
361 as a guide in the search for habitable places on Earth and extraterrestrial environments.

362 **Acknowledgments.** We thank Marc Alperin for invaluable conversations about methane  
363 over 17 years, Brett Baker for conversations about the metagenomic data, Andrew Steen, Jordan  
364 Bird, Lauren Mullen, Taylor Royalty, Katherine Sipes, Katherine Fullerton, and Joy Buongiorno  
365 for assistance retrieving the sediment samples, Michael Piehler for the use of his laboratory at the  
366 UNC Institute of Marine Sciences, Frank Löffler for use of ion and flame ionized detector  
367 chromatographs, Robert Murdoch and the University of Tennessee Knoxville Bioinformatics  
368 Resource Center for computational resources, and Christopher G. Kevorkian and Alexandra  
369 Emmons for aid in analysis. This work was funded by Alfred P. Sloan Foundation Fellowship  
370 (FG-2015-65399) and NASA Exobiology (NNX16AL59G).

## 371 **Methods**

372 ***Sample collection and geochemistry.*** Two push cores (core 1 was 78 cm deep and core 6 was 75  
373 cm deep) were collected in May 2017 (1 m) at the White Oak River Estuary Station H (34  
374 44.490' N, 77 07.44' W), in 1.5 m water depth. Other cores (accounting for numbers 2-5) were  
375 taken and used for other projects or thrown away because they were not long enough. Using a  
376 plunger inserted from the bottom to push the core up, sediment intervals were sectioned in 3 cm  
377 intervals from 0 to 9 cm, 1 cm intervals to 60 cm and in 3 cm intervals below that. These  
378 intervals were chosen to obtain high depth resolution in the section most likely to include

379 anaerobic oxidation of methane. Methane, sulfate,  $\delta^{13}\text{C}$  of methane, hydrogen, and cell counts  
380 were measured as described previously (29). To measure methane, sediment was quickly sub-  
381 cored with a plastic cut-off 4 ml syringe, placed into glass serum vial containing 1 ml 0.1 M  
382 KOH, sealed with a butyl rubber stopper, and shaken to mix. Methane was determined by  
383 injecting 100  $\mu\text{l}$  of gas from the headspace, after shaking the bottle vigorously for 1 min, into a  
384 gas chromatograph with a flame ionization detector (Agilent, Santa Clara, CA). Due to volume  
385 limitations when slicing into 1 cm intervals, porosity was not measured in these cores, but was  
386 used from core A in a previous core (8). To measure  $\delta^{13}\text{C}$  values of methane, 4 ml of headspace  
387 from the vial used for methane measurements was removed via syringe and injected into a gas  
388 bag containing hydrocarbon free zero gas (Airgas, Radnor, PA). This was then measured on a  
389 cavity ring down spectrometer using a small sample introduction module (Picarro, Santa Clara,  
390 CA). To measure hydrogen, 2 ml of carefully sub-cored sediment was placed into a 10 ml brown  
391 glass vial being careful to disturb the sediment as little as possible, sealed with a black butyl  
392 stopper, and gassed with helium. The negative control was an empty bottle gassed with helium.  
393 After 4 days equilibration at near *in situ* temperature (21°C), 500 $\mu\text{l}$  of headspace gas was  
394 injected into a Peak Performer 1 Reducing Compound Photometer (Peak Laboratories, Mountain  
395 View, CA). Premixed hydrogen ppm lab bottles (Airgas) were used as standards. For cell  
396 abundance, 1 ml of sediment was placed in a 2 ml screw cap tube with 3% paraformaldehyde. To  
397 measure sulfate, a 15 ml plastic tube was filled completely with sediment and centrifuged at  
398 5,000 xg for 5 minutes. A syringe was used to remove the supernatant below the air interface.  
399 The porewater was filtered using a 0.2  $\mu\text{m}$  syringe filter into 100  $\mu\text{l}$  of 10% HCl to a final  
400 volume of 1 ml. Porewater sulfate concentrations were determined by ion chromatography

401 (Dionex, Sunnyvale, CA). A 10 ml cut off syringe was filled, capped with parafilm, and frozen at  
402 -80°C for later molecular analysis.

403 **Cell quantification.** Total cell counts were determined by direct epifluorescence microscopy  
404 using SYBRGold DNA stain (Invitrogen, Carlsbad, CA). Sediments were sonicated at 20%  
405 power for 40 seconds to disaggregate cells from sediments and diluted 40-fold into PBS prior to  
406 filtration onto a 0.2 µm polycarbonate filter (Fisher Scientific, Waltham, MA) and mounted onto  
407 a slide.

408

409 **16S Ribosomal RNA Gene Amplicons.** DNA was extracted from frozen sediments using the Fast  
410 DNA kit for Soil (MP Bio, Santa Ana, CA). The V4 region was amplified using primers 806r  
411 and 515f (62), as a universal primer pair for Bacteria and Archaea. A negative sample containing  
412 DNA extracted from autoclaved sediment control yielded no amplification. Library preparations  
413 via Nexterra kit and sequencing using an Illumina MiSeq were performed at the Center for  
414 Environmental Biotechnology at the University of Tennessee in Knoxville, producing  
415 14,162,094 reads total. The CLC Genomic Workbench 10.0 (CLC Bio, a QIAGEN Company,  
416 Aarhus, Denmark) was used to trim adaptors and make contigs of bidirectional sequences,  
417 cluster operational taxonomic units (OTUs) at 97% similarity, and classify them with the Silva  
418 reference set 132 (63). 36.4% of a total of 866,834 unique sequences were removed as chimeric,  
419 resulting in a total of 9,165,958 reads in 25,116 OTUs. Approximately 5% of the remaining  
420 sequences were removed for not classifying as Archaea or Bacteria. Reads were then randomly  
421 subset from sample libraries to the size of the smallest library (77,609) for normalization. Only  
422 OTUs with at least an average of 2 reads per sample were considered, resulting in 2,307 OTUs

423 across 59 libraries. 16S rRNA genes from metagenomes from this site (37) were obtained from  
424 IMG/ER, and classified analogously to the amplicon dataset.

425 ***Data analysis of published ANME-1 enrichment experiments.*** All nine transcriptomes from  
426 Wegener et al., 2015, were downloaded from the NCBI SRA as fastq files, and trimmed for  
427 quality with Trimmomatic 0.33 (64). Twenty-six genes for methyl coenzyme M reductase were  
428 obtained from NCBI to make a custom Blast database including representatives from all major  
429 cultured methanogens, and *mcrA* genes from MAGs of uncultured organisms. The *mcrA* database  
430 included the following *mcrA* genes: *Methanospirillum hungatei* strain JF-1 (AF313805),  
431 *Methanobacterium bryantii* strain DSM 863 (AF313806), Uncultured Methanobacteriaceae methanogen  
432 RS-MCR12 (AF313818), Uncultured RC1 methanogen RS-MCR15 (AF313821), *Methanoculleus*  
433 *bourgensis* strain DSM 3045 (AF414036), *Methanosaeta concilii* strain DSM 3671 (AF414037),  
434 *Methanocaldococcus jannaschii* strain DSM 2661 (AF414040), *Methanopyrus kandleri* strain DSM 6324  
435 (AF414042), *Methanosphaera stadtmanae* strain DSM 3091 (AF414047), *Methanothermococcus*  
436 *thermolithotrophicus* strain DSM 2095 (AF414048), *Methanocorpusculum labreanum* (AY260441),  
437 Uncultured ANME-1Guaymas archaeon (FR682814), Uncultured ANME-1 archaeon clone F17.1\_30A02  
438 (AY324363), Uncultured ANME-1 archaeon clone GZfos\_17\_30.54 (AY324369), Uncultured ANME-2  
439 archaeon clone GZfos\_26\_28.10 (AY324370), Uncultured ANME-2 archaeon clone GZfos\_35\_28.12  
440 (AY324371), *Methanomassiliicoccus luminyensis* strain B10 (HQ896500), Uncultured  
441 Methanomicrobiales archaeon clone H07 (AY837764), Uncultured Methanomicrobiales archaeon clone  
442 B12 (AY837766), Uncultured Methanomicrobiales archaeon clone C01 (AY837767), Uncultured  
443 Methanosarcinales archaeon clone C05 (AY837769), Uncultured ANME-2Guaymas archaeon clone D06  
444 (AY837771), Uncultured Methanosarcinales archaeon clone B09 (AY837774), Uncultured  
445 Methanococcales archaeon clone D03 (AY837775), *Methanosarcina mazeii* strain C 16 (KT387805).

446 The NCBI Blast tool was used to obtain hits with e-values less than  $1e-10$  of the  
447 transcriptomes among this *mcrA* database. Rates of methane production and consumption were  
448 calculated through WebPlotDigitizer on Extended Data Figure 4 from Wegener et al., 2015,  
449 which showed methane concentrations through time when the added hydrogen concentrations  
450 were high ( $> 0.5$  mM) or low ( $< 0.1$  mM).

451 **Data archiving.** 16S rRNA gene sequences can be found at the NCBI Genbank short read  
452 archive with accession number PRJNA565996.

### 453 Figures

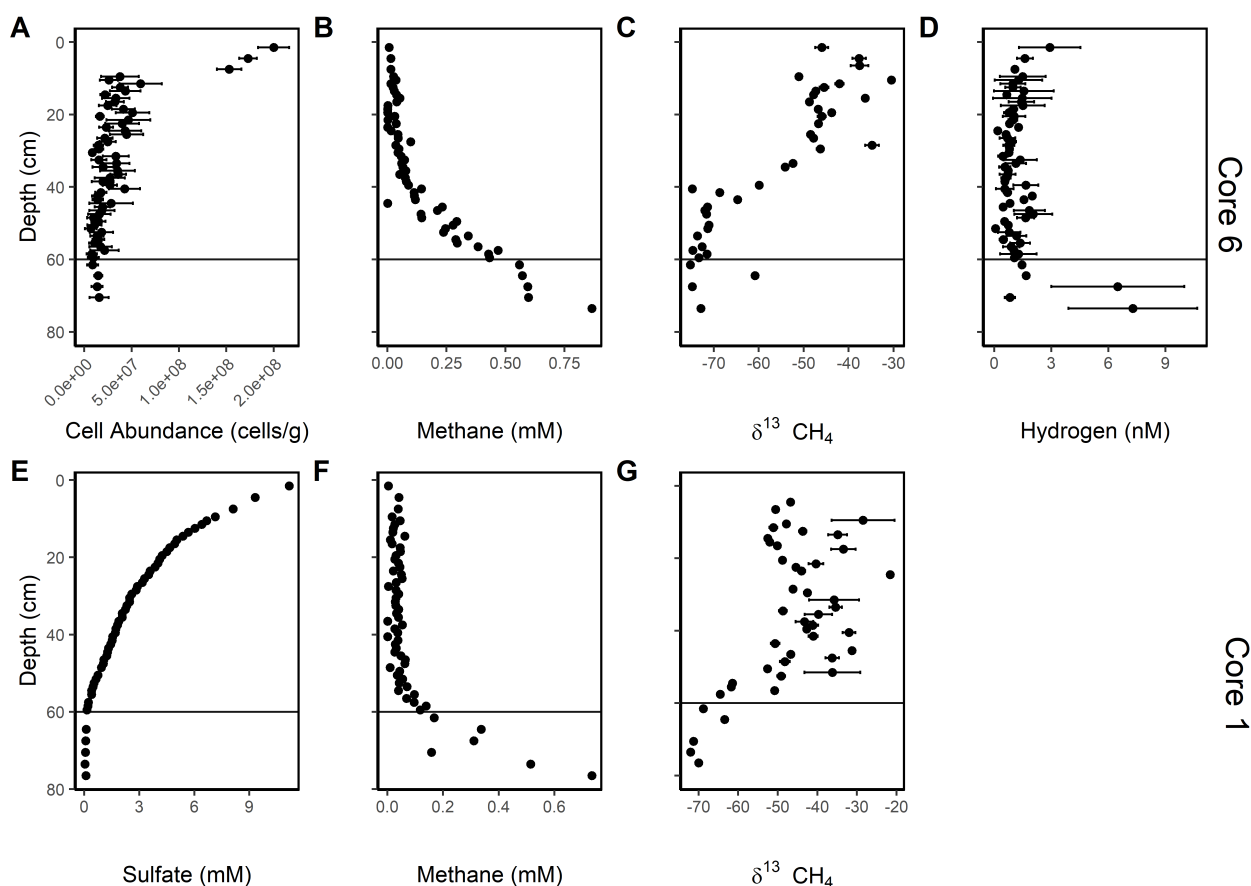

**Figure 1. White Oak River estuary cores show methane-consuming or AOM sediments in the SMTZ and methane-producing or methanogenic sediments below it.** Aqueous geochemistry for cores 6 (top row) and 1 (bottom row), with A) cell abundance, B and F) methane concentration, C and G)  $\delta^{13}\text{C}$  of methane, D) hydrogen concentration, and E) sulfate concentration. Black line shows approximate transition from AOM to methanogenesis.

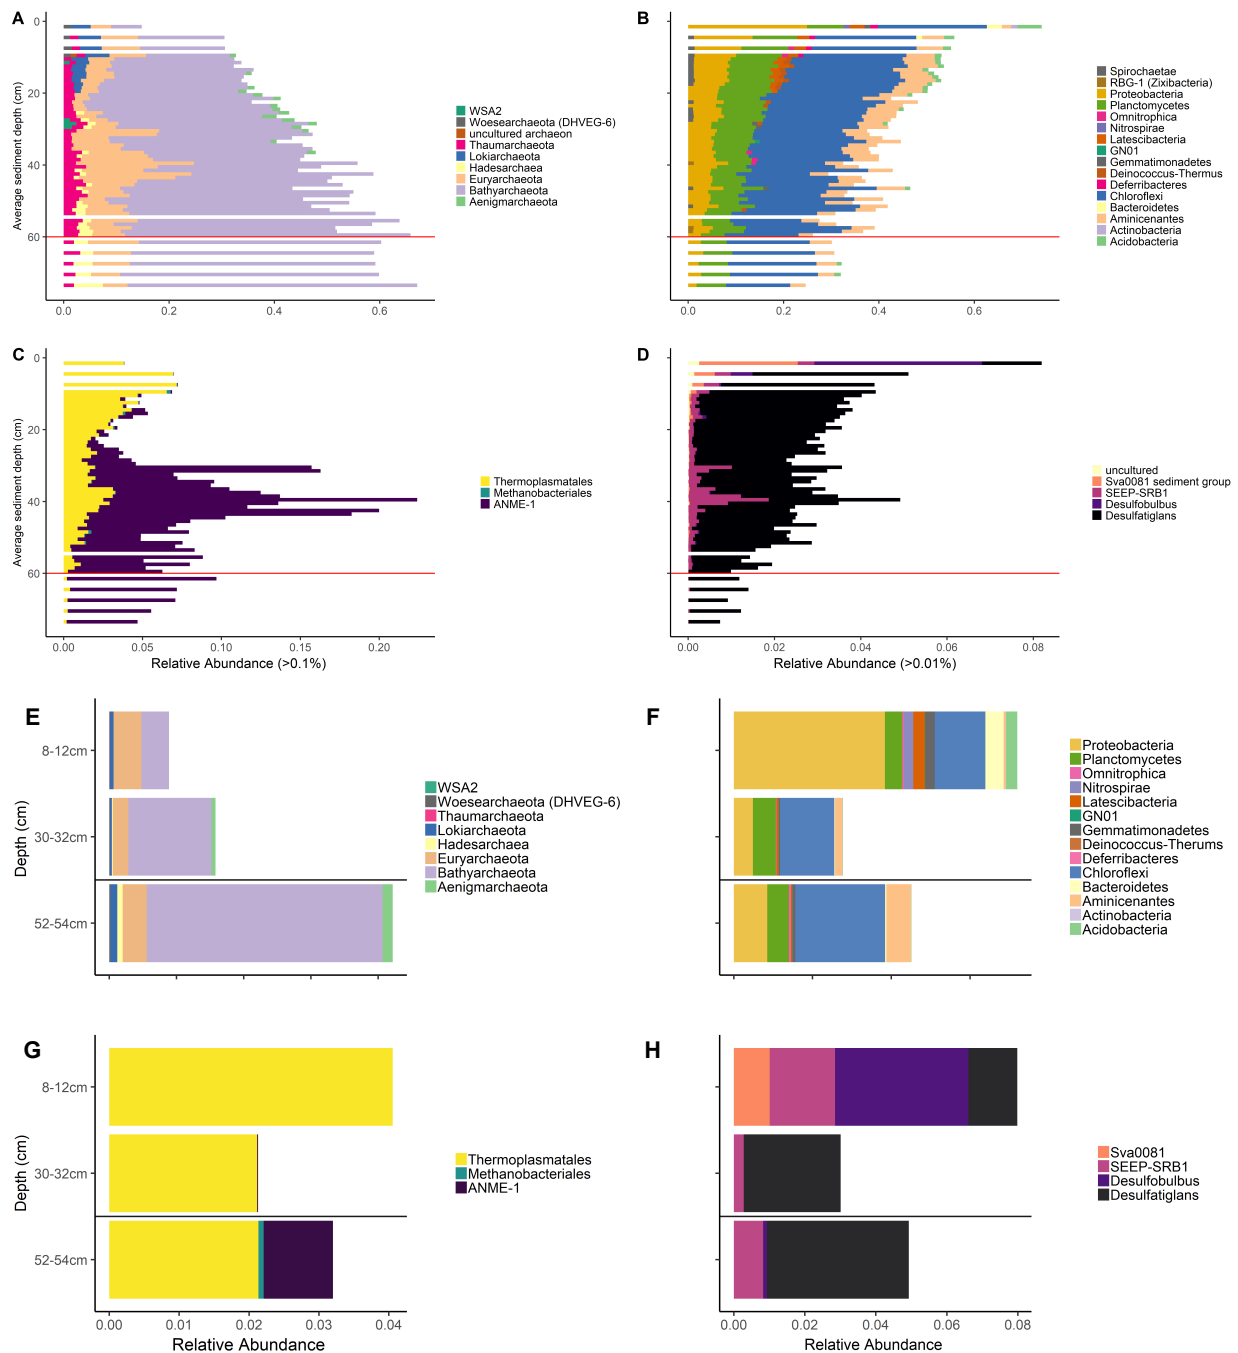

**Figure 2. ANME-1 and *Desulfatiglans sp.* dominate methane- and sulfur-cycling organisms in both methane-consuming and methane-producing sediments.** Relative abundance of 16S rRNA gene sequences for all archaea (left panels) and all bacteria (right panels), for amplicon libraries (A-D) and metagenomes (E-H), grouped at the phylum level. C, D, G, and H show putative sulfate-reducing bacteria and Euryarchaeota, grouped at the family level. Only phyla with >1% relative 16S rRNA gene sequence abundance for bacteria and > 0.1% for archaea are shown. Black lines show transition from AOM to methanogenesis.

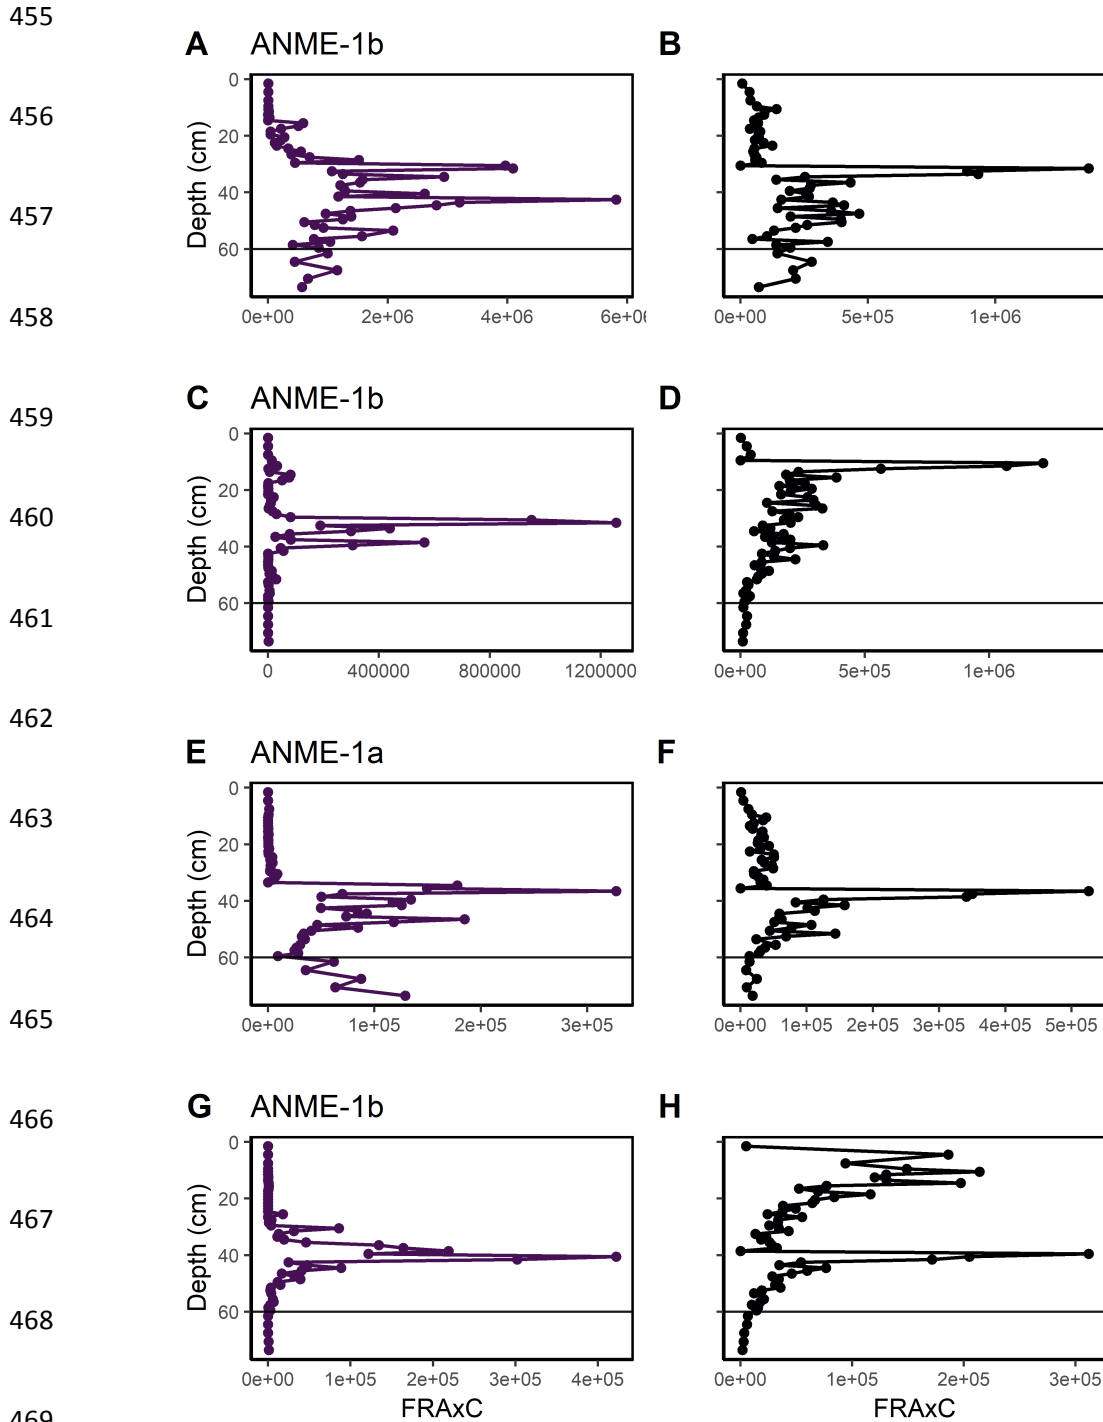

470 **Figure 3. ANME-1 Fraction Read Abundance times Cell counts (FRaXC)**  
471 **and sulfate reducing bacteria have co-occurring peaks during AOM but**  
472 **not methanogenesis.** Values for the four most abundant OTUs of ANME-1  
473 (left panels, A, C, E, and G) and *Desulfatiglans sp.* (right panels, B, D, F, and  
474 H) with depth, ordered by decreasing OTU abundance from top to bottom  
475 panels. Colors match those in Figure 2, and black line indicates AOM to  
476 methanogenesis transition.

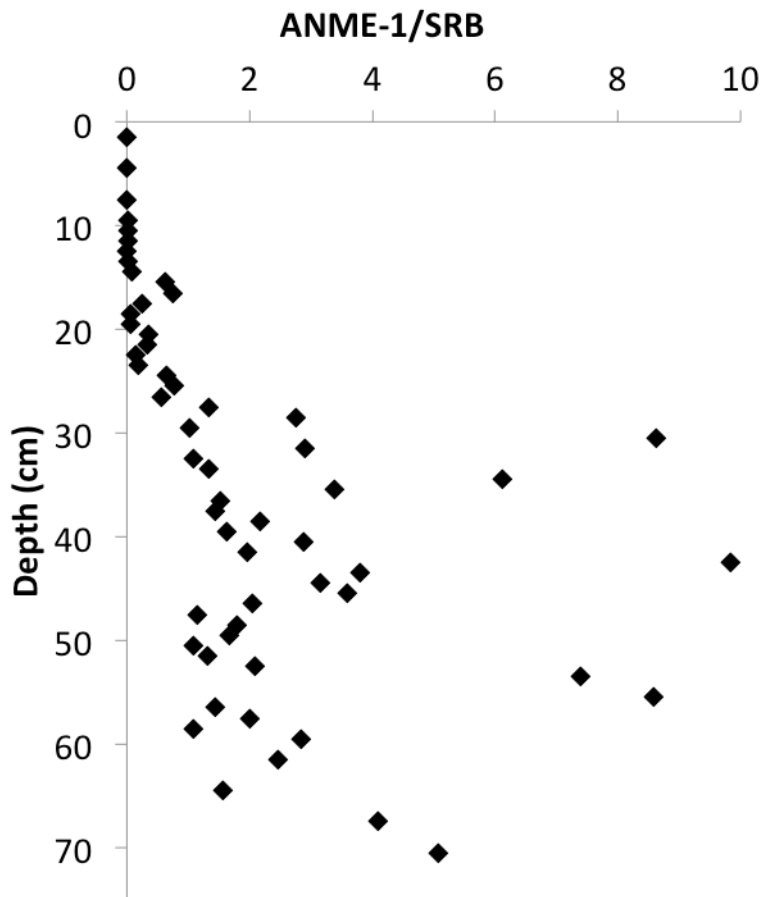

**Figure 4. ANME-1 increased relative to sulfate reducing bacteria throughout the SMTZ and below.** Ratio of total ANME-1 16S rRNA gene abundance to total sulfate reducing bacteria 16S rRNA gene abundance with depth.

472

473



474

475

476

477

478

479

480

481

482

483

484

485

486

487

488

489

490

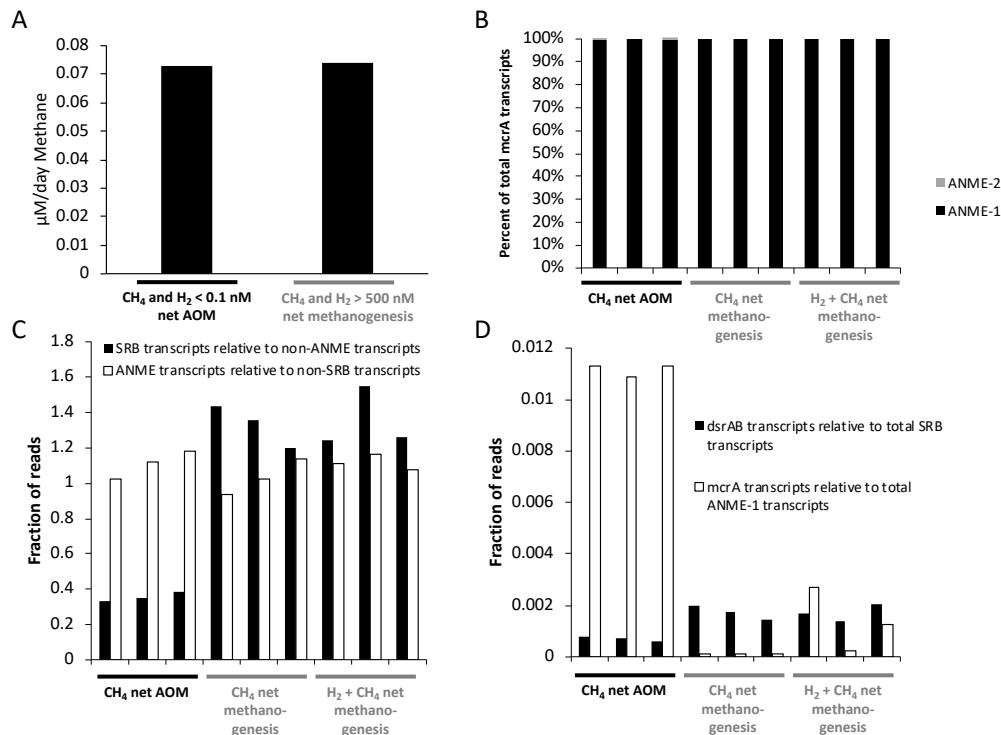

**Figure 5. In laboratory enrichments, ANME-1 were likely responsible for AOM in methane-consuming conditions and methanogenesis in methane-producing conditions, controlled by the hydrogen concentration.** Shown are A) rates of methane consumption or production, dependent on hydrogen concentrations, B-D) transcript read abundances when triplicates were gassed with methane alone (AOM), hydrogen alone (methanogenic), or hydrogen plus methane (methanogenic), with B) taxonomic identities of all methyl coenzyme-M reductase subunit A (*mcrA*) gene transcripts, C) relative 16S rRNA gene transcript abundance of putative sulfate reducers relative to all transcripts besides those of ANME-1 and of ANME-1 relative to all transcripts besides those of sulfate reducers, and D) transcripts of dissimilatory sulfite reductase subunits A and B (*dsrAB*) relative to total transcripts from sulfate reducing bacteria and transcripts of *mcrA* relative to total transcripts from ANME-1. Data were from A) Wegener et al., 2015 Figure S4, B) our Blast analysis of transcripts obtained from the NCBI short read archive from Wegener et al., 2015, and C and D) Wegener et al., 2015.

491

492

## Anaerobic oxidation of methane

493

494

495

496

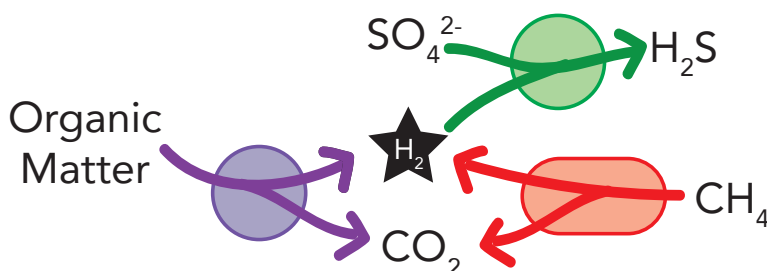

497

## Methanogenesis

498

499

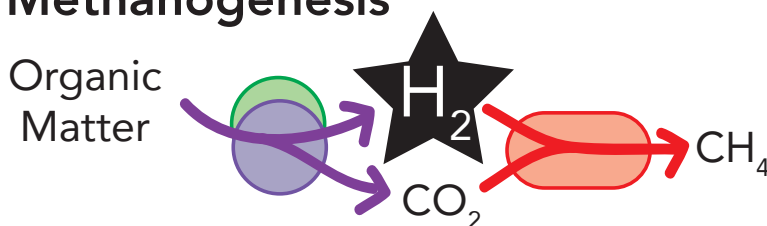

500

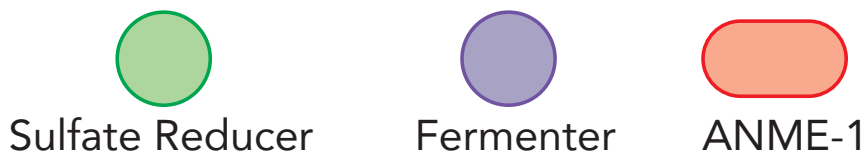

501

502

### Figure 6. Model for AOM and methanogenesis in non-seep marine sediments.

503

Fermenters produce hydrogen from organic matter under both conditions. During anaerobic oxidation of methane, sulfate reducers bring hydrogen concentrations so low that methane oxidation is exergonic. During methanogenesis, sulfate reducers have run out of sulfate so hydrogen concentrations build up to a level that makes ANME-1 switch to forward methanogenesis. Sulfate reducers may persist by switching to fermentation. Purple = fermenters, green = sulfate reducers, and red = ANME-1.

505

506

507

## 508   **References**

- 509   1.     Reeburgh WS (2007) Oceanic Methane Biogeochemistry. *Chem Rev* 107:486–513.
- 510   2.     Holler T, et al. (2011) Thermophilic anaerobic oxidation of methane by marine microbial  
511     consortia. *ISME J* 5(12):1946–56.
- 512   3.     Knittel K, Boetius A (2009) Anaerobic oxidation of methane: Progress with an unknown  
513     process. *Annu Rev Microbiol* 63:311–334.
- 514   4.     Kendall MM, et al. (2007) Diversity of Archaea in marine sediments from Skan Bay,  
515     Alaska, including cultivated methanogens, and description of *Methanogenium boonei* sp.  
516     nov. *Appl Environ Microbiol* 73(2):407–14.
- 517   5.     Jagersma CG, et al. (2012) Enrichment of ANME-1 from Eckernförde Bay sediment on  
518     thiosulfate, methane and short-chain fatty acids. *J Biotechnol* 157(4):482–9.
- 519   6.     Orcutt B, Boetius A, Elvert M, Samarkin V, Joye SB (2005) Molecular biogeochemistry  
520     of sulfate reduction, methanogenesis and the anaerobic oxidation of methane at Gulf of  
521     Mexico cold seeps. *Geochim Cosmochim Acta* 17:4267–4281.
- 522   7.     House CH, et al. (2009) Extensive carbon isotopic heterogeneity among methane seep  
523     microbiota. *Environ Microbiol* 11(9):2207–15.
- 524   8.     Lloyd KG, Alperin MJ, Teske A (2011) Environmental evidence for net methane  
525     production and oxidation in putative ANaerobic MEthanotrophic (ANME) archaea.  
526     *Environ Microbiol* 13(9):2548–2564.
- 527   9.     Bertram S, et al. (2013) Methanogenic capabilities of ANME-archaea deduced from <sup>13</sup>C-

- 528           labelling approaches. *Environ Microbiol* 15(8):2384–2393.
- 529   10.   Lloyd KG, Steen AD, Ladau J, Yin J, Crosby L (2018) Phylogenetically novel uncultured  
530       microbial cells dominate Earth microbiomes. *mSystems* 3:e00055-18.
- 531   11.   Martens S, Berner RA (1977) Interstitial water chemistry of anoxic Long Island Sound  
532       sediments. 1. Dissolved gases. *Limnol Oceanogr* 22(January):10–25.
- 533   12.   Hoehler TM, Alperin MJ, Albert DB, Martens CS (1994) Field and laboratory studies of  
534       methane oxidation in an anoxic marine sediment: Evidence for a methanogen-sulfate  
535       reducer consortium. *Global Biogeochem Cycles* 8(4):451–463.
- 536   13.   Hoehler TM, Alperin MJ, Albert DB, Martens CS (1998) Thermodynamic control on  
537       hydrogen concentrations in anoxic sediments. *Geochim Cosmochim Acta* 62(10):1745–  
538       1756.
- 539   14.   Hoehler TM, Alperin MJ, Albert DB, Martens CS (2001) Apparent minimum free energy  
540       requirements for methanogenic Archaea and sulfate-reducing bacteria in an anoxic marine  
541       sediment. *FEMS Microbiol Ecol* 38:33–41.
- 542   15.   Slonczewski JL, Foster JW (2017) *Microbiology: An Evolving Science, 4rd Ed.* (W. W.  
543       Norton & Co.).
- 544   16.   Valentine DL, Blanton DC, Reeburgh WS (2000) Hydrogen production by methanogens  
545       under low-hydrogen conditions. *Arch Microbiol*:415–421.
- 546   17.   Mukhopadhyay B, Johnson EF, Wolfe RS (2000) A novel pH<sub>2</sub> control on the expression  
547       of flagella in the hyperthermophilic strictly hydrogenotrophic methanarchaeon  
548       Methanococcus jannaschii. *Proc Natl Acad Sci U S A* 97(21):11522–7.

- 549 18. Nauhaus K, Albrecht M, Elvert M, Boetius A, Widdel F (2007) In vitro cell growth of  
550 marine archaeal-bacterial consortia during anaerobic oxidation of methane with sulfate.  
551 *Environ Microbiol* 9:187–196.
- 552 19. Underwood S, Lapham L, Teske A, Lloyd KG (2016) Microbial community structure and  
553 methane-cycling activity of subsurface sediments at Mississippi Canyon 118 before the  
554 Deepwater Horizon disaster. *Deep Res Part II* 129:148–156.
- 555 20. Beulig F, Røy H, McGlynn SE, Jørgensen BB (2019) Cryptic CH<sub>4</sub> cycling in the sulfate–  
556 methane transition of marine sediments apparently mediated by ANME-1 archaea. *ISME J*  
557 13(2):250–262.
- 558 21. Harrison BK, Zhang H, Berelson W, Orphan VJ (2009) Variations in archaeal and  
559 bacterial diversity associated with the sulfate-methane transition zone in continental  
560 margin sediments (Santa Barbara Basin, California). *Appl Environ Microbiol* 75(6):1487–  
561 99.
- 562 22. Whitman WB ed. (2015) *Bergey's Manual of Systematics of Archaea and Bacteria* (John  
563 Wiley & Sons).
- 564 23. Meyerdierks A, et al. (2010) Metagenome and mRNA expression analyses of anaerobic  
565 methanotrophic archaea of the ANME-1 group. *Environ Microbiol* 12:422–439.
- 566 24. Hallam SJ, et al. (2004) Reverse methanogenesis: testing the hypothesis with  
567 environmental genomics. *Science* 305(5689):1457–62.
- 568 25. Wegener G, Krukenberg V, Riedel D, Tegetmeyer HE, Boetius A (2015) Intercellular  
569 wiring enables electron transfer between methanotrophic archaea and bacteria. *Nature*

- 570 526:587–590.
- 571 26. Polz MF, Cavanaugh CM (1998) Bias in template-to-product ratios in multitemplate PCR.  
572 *Appl Environ Microbiol* 64(10):3724–3730.
- 573 27. Lloyd KG, May MK, Kevorkian RT, Steen AD (2013) Meta-analysis of quantification  
574 methods shows that archaea and bacteria have similar abundances in the subseafloor. *Appl*  
575 *Environ Microbiol* 79(24):7790–7799.
- 576 28. Buongiorno J, et al. Inter-laboratory quantification of Bacteria and Archaea in deeply  
577 buried sediments of the Baltic Sea (IODP Exp. 347). *FEMS Microbiol Ecol*.
- 578 29. Kevorkian R, Bird JT, Shumaker A, Lloyd KG (2018) Estimating population turnover  
579 rates by relative quantification methods reveals microbial dynamics in marine sediment.  
580 *Appl Environ Microbiol* 84(1):1–16.
- 581 30. Martens CS, Albert DB, Alperin MJ (1998) Biogeochemical processes controlling  
582 methane in gassy coastal sediments - Part 1. A model coupling organic matter flux to gas  
583 production, oxidation and transport. *Cont Shelf Res* 18:1741–1770.
- 584 31. Whiticar MJ (1999) Carbon and hydrogen isotope systematics of bacterial formation and  
585 oxidation of methane. *Chem Geol* 161:291–314.
- 586 32. Jørgensen BB, Kasten S (2006) *Sulfur cycling and methane oxidation* eds Schulz H, Zabel  
587 M (Springer, Berlin; Heidelberg) doi:10.1007/3-540-32144-6.
- 588 33. Alperin MJ, Reeburgh WS, Whiticar MJ (1988) Carbon and hydrogen isotope  
589 fractionation resulting from anaerobic methane oxidation. *Global Biogeochem Cycles*  
590 2(3):279–288.

- 591 34. Holler T, et al. (2009) Substantial  $^{13}\text{C}/^{12}\text{C}$  and D/H fractionation during anaerobic  
592 oxidation of methane by marine consortia enriched in vitro. *Environ Microbiol Rep*  
593 1(5):370–376.
- 594 35. Yoshinaga MY, et al. (2014) Carbon isotope equilibration during sulphate-limited  
595 anaerobic oxidation of methane. *Nat Geosci* 7:190–194.
- 596 36. Shima S, et al. (2012) Structure of a methyl-coenzyme M reductase from Black Sea mats  
597 that oxidize methane anaerobically. *Nature* 481(7379):98–101.
- 598 37. Lazar CS, et al. (2016) Genomic evidence for distinct carbon substrate preferences and  
599 ecological niches of Bathyarchaeota in estuarine sediments. *Environ Microbiol*  
600 18(4):1200–1211.
- 601 38. Lloyd KG, Lapham L, Teske A (2006) An anaerobic methane-oxidizing community of  
602 ANME-1b archaea in hypersaline gulf of Mexico sediments. *Appl Environ Microbiol*  
603 72(11). doi:10.1128/AEM.00886-06.
- 604 39. Evans PN, et al. (2015) Methane metabolism in the archaeal phylum Bathyarchaeota  
605 revealed by genome-centric metagenomics. *Science (80- )* 350(6259):434–8.
- 606 40. Kubo K, et al. (2012) Archaea of the Miscellaneous Crenarchaeotal Group are abundant,  
607 diverse and widespread in marine sediments. *ISME J* 6(10):1949–1965.
- 608 41. Laso-Peréz R, Wegener G, Knittel K, Widdel F (2016) Thermophilic archaea activate  
609 butane via alkyl-CoM formation. *Nature*:1–36.
- 610 42. He Y, et al. (2016) Genomic and enzymatic evidence for acetogenesis among multiple  
611 lineages of the archaeal phylum Bathyarchaeota widespread in marine sediments. *Nat*

- 612            *Microbiol* 35:1–9.
- 613    43.    Lloyd KG, et al. (2013) Predominant archaea in marine sediments degrade detrital  
614            proteins. *Nature*:1–6.
- 615    44.    Baker BJ, et al. (2016) Genomic inference of the metabolism of cosmopolitan subsurface  
616            Archaea, Hadesarchaea. *Nat Microbiol* 1(3):1–7.
- 617    45.    Nobu MK, Narihiro T, Kuroda K, Mei R, Liu WT (2016) Chasing the elusive  
618            Euryarchaeota class WSA2: Genomes reveal a uniquely fastidious methyl-reducing  
619            methanogen. *ISME J* 10(10):2478–2487.
- 620    46.    Miroshnichenko ML, Kolganova T V., Spring S, Chernyh N, Bonch-Osmolovskaya EA  
621            (2010) *Caldithrix palaeochoryensis* sp. nov., a thermophilic, anaerobic, chemo-  
622            organotrophic bacterium from a geothermally heated sediment, and emended description  
623            of the genus *Caldithrix*. *Int J Syst Evol Microbiol* 60(9):2120–2123.
- 624    47.    Nauhaus K, Treude T, Boetius A, Krüger M (2005) Environmental regulation of the  
625            anaerobic oxidation of methane: A comparison of ANME-I and ANME-II communities.  
626            *Environ Microbiol* 7(1):98–106.
- 627    48.    Orphan VJ, House CH, Hinrichs K, Mckeegan KD, Delong EF (2001) Methane-  
628            consuming archaea revealed by directly coupled isotopic and phylogenetic analysis.  
629            *Science* (80- ) 293(5529):484–487.
- 630    49.    Krukenberg V, et al. (2018) Gene expression and ultrastructure of meso- and thermophilic  
631            methanotrophic consortia. *Environ Microbiol* 20(5):1651–1666.
- 632    50.    Nölling J, Reeve JN (1997) Growth- and substrate-dependent transcription of the formate



- 633 dehydrogenase (fdhCAB) operon in *Methanobacterium thermoformicicum* Z-245. *J*  
634 *Bacteriol* 179(3):899–908.
- 635 51. Kato S, Kosaka T, Watanabe K (2008) Comparative transcriptome analysis of responses  
636 of *Methanothermobacter thermautotrophicus* to different environmental stimuli. *Environ*  
637 *Microbiol* 10(4):893–905.
- 638 52. Topçuoğlu BD, Meydan C, Nguyen TB, Lang SQ, Holden JF (2019) Growth kinetics,  
639 carbon isotope fractionation, and gene expression in the hyperthermophile  
640 *Methanocaldococcus jannaschii* during hydrogen-limited growth and interspecies hydrogen  
641 transfer. *Appl Environ Microbiol* 85(9):1–14.
- 642 53. Hendrickson EL, Haydock AK, Moore BC, Whitman WB, Leigh JA (2007) Functionally  
643 distinct genes regulated by hydrogen limitation and growth rate in methanogenic Archaea.  
644 *Proc Natl Acad Sci USA* 104:8930–8934.
- 645 54. Finke N, Hoehler TM, Jørgensen BB (2007) Hydrogen “leakage” during methanogenesis  
646 from methanol and methylamine: implications for anaerobic carbon degradation pathways  
647 in aquatic sediments. *Environ Microbiol* 9(4):1060–71.
- 648 55. Hendrickson EL, Leigh JA (2008) Roles of coenzyme F420-reducing hydrogenases and  
649 hydrogen- and F420-dependent methylenetetrahydromethanopterin dehydrogenases in  
650 reduction of F420 and production of hydrogen during methanogenesis. *J Bacteriol*  
651 190(14):4818–4821.
- 652 56. Walker CB, et al. (2012) Functional responses of methanogenic archaea to syntrophic  
653 growth. *ISME J* 6(11):2045–2055.

- 654 57. Scheller S, Goenrich M, Boecher R, Thauer RK, Jaun B (2010) The key nickel enzyme of  
655 methanogenesis catalyses the anaerobic oxidation of methane. *Nature* 465(7298):606–608.
- 656 58. Lever MA (2013) Functional gene surveys from ocean drilling expeditions - a review and  
657 perspective. *FEMS Microbiol Ecol* 84:1–23.
- 658 59. Wilms R, Sass H, Ko B, Cypionka H, Engelen B (2006) Specific bacterial, archaeal, and  
659 eukaryotic communities in tidal-flat sediments along a vertical profile of several meters.  
660 *Appl Environ Microbiol* 72(4):2756–2764.
- 661 60. Vetriani C, Jannasch HW, Gregor BJMAC, Stahl DA, Reysenbach A (1999) Population  
662 structure and phylogenetic characterization of marine benthic archaea in deep-sea  
663 sediments. *Appl Environ Microbiol* 65(10):4375–4384.
- 664 61. Biddle JF, et al. (2006) Heterotrophic archaea dominate sedimentary subsurface  
665 ecosystems off Peru. *Proc Natl Acad Sci USA* 103(10):3846–3851.
- 666 62. Caporaso JG, et al. (2012) Ultra-high-throughput microbial community analysis on the  
667 Illumina HiSeq and MiSeq platforms. *ISME J* 6:1621–1624.
- 668 63. Pruesse E, et al. (2007) SILVA: a comprehensive online resource for quality checked and  
669 aligned ribosomal RNA sequence data compatible with ARB. *Nucleic Acids Res*  
670 35(21):7188–7196.
- 671 64. Bolger AM, Lohse M, Usadel B (2014) Trimmomatic: a flexible trimmer for Illumina  
672 sequence data. *Bioinformatics* 30(15):2114–2120.

673
